# Supplementary material
Source: publisher figshare collection journal article supplement (https://sage.figshare.com/ndownloader/files/20179097)
Supplement: Supplementary file 1 [file 20179097]

**Table 2 Supplementary for Digital Content***Professional Values Scores*

| <b>NPVS-R Dimensions</b>                                                                                  | <b>Rank</b> | <b>Mean</b> | <b>SD</b> | <b>%</b> |
|-----------------------------------------------------------------------------------------------------------|-------------|-------------|-----------|----------|
| <b>Caring Provisions</b>                                                                                  |             |             |           |          |
| 1. Safeguard patient's rights and privacy                                                                 | 5           | 4.71        | 0.45      | 71.9     |
| 2. Maintain confidentiality of patient information                                                        | 1           | 4.81        | 0.40      | 80.9     |
| 3. Provide care without prejudice to patients from diverse backgrounds                                    | 2           | 4.76        | 0.60      | 83.1     |
| 4. Practice guided by principles of faithfulness and respect for the person                               | 7           | 4.57        | 0.62      | 62.9     |
| 5. Protect the rights of participants in research                                                         | 4           | 4.72        | 0.48      | 73.0     |
| 6. Protect moral and legal; rights of patients                                                            | 3           | 4.75        | 0.48      | 77.5     |
| 7. Act as a patient advocate                                                                              | 6           | 4.67        | 0.60      | 74.2     |
| 8. Confront practitioners with questionable or inappropriate practice.                                    | 8           | 4.49        | 0.76      | 60.7     |
| 9. Refuse to participate in care if ethically inappropriate                                               | 9           | 3.81        | 1.21      | 37.1     |
| <b>Activism</b>                                                                                           |             |             |           |          |
| 1. Participate in activities of professional nursing associations.                                        | 5           | 4.13        | 0.66      | 28.1     |
| 2. Participate in nursing research and/or implement research findings appropriate to practice.            | 4           | 4.20        | 0.68      | 34.8     |
| 3. Advance the profession through active involvement in health-related policy initiatives and activities. | 1           | 4.32        | 0.65      | 42.7     |
| 4. Recognize the role of professional nursing associations in shaping health care policy.                 | 2           | 4.31        | 0.56      | 36.0     |
| 5. Participate in public policy decisions affecting distribution of resources.                            | 3           | 4.24        | 0.64      | 34.8     |
| <b>Trust</b>                                                                                              |             |             |           |          |
| 1. Maintain competence in area of practice.                                                               | 2           | 4.73        | 0.52      | 75.3     |
| 2. Accept responsibility and accountability for own practice.                                             | 1           | 4.75        | 0.51      | 77.5     |
| 3. Engage in ongoing self-evaluation.                                                                     | 5           | 4.66        | 0.50      | 67.4     |
| 4. Request consultation/collaboration when unable to meet patient needs.                                  | 4           | 4.66        | 0.52      | 68.5     |
| 5. Seek additional education to update knowledge and skills.                                              | 3           | 4.70        | 0.53      | 71.9     |
| <b>Professionalism</b>                                                                                    |             |             |           |          |
| 1. Establish standards as a guide for practice.                                                           | 2           | 4.54        | 0.60      | 58.4     |
| 2. Promote and maintain standards where planned learning activities for students to take place.           | 1           | 4.62        | 0.511     | 62.9     |
| 3. Participate in peer review.                                                                            | 4           | 4.28        | 0.81      | 44.9     |
| 4. Initiate actions to improve environments of practice.                                                  | 3           | 4.49        | 0.62      | 55.1     |
| <b>Justice</b>                                                                                            |             |             |           |          |
| 1. Assume responsibility for meeting the health needs of the culturally diverse population.               | 3           | 4.49        | 0.81      | 61.8     |
| 2. Promote equitable access to nursing and health care.                                                   | 2           | 4.70        | 0.55      | 73.0     |
| 3. Protect the health and safety of the public                                                            | 1           | 5.27        | 0.54      | 73.0     |
